# Supplementary material for: Surrounded by genes: Parental genetic effects on children’s mental health
Source: Research Square preprint supplement (doi:10.21203/rs.3.rs-6862539/v1), 2025-06-25
Supplement: Supplementary file 2 [file d0bae933b4a7a43c04b4377c.xlsx]

## Sheet: results_SMFQ_8years
PGS	Rsquared_train....c.0.000489461295448..0.00045736589159..0.000187867280359..	RMSE_train....c.2.179058..2.18246..2.184425..2.182666..2.180801..	stdCoeff_train....c..0.02212377218..0.02138611446...0.01370646856..	Rsquared_test....c.0.00028837281...0.001057132298..0.000835729872..	RMSE_test....c.2.222015..2.22351..2.221407..2.222162..2.220024..	stdCoeff_test
Educational_attainment_F	0.000489461	2.17906	-0.0221238	0.000288373	2.22201	-0.0220556
Educational_attainment_M	0.000457366	2.18246	0.0213861	-0.00105713	2.22351	0.0210115
Educational_attainment_C	0.000187867	2.18443	-0.0137065	0.00083573	2.22141	-0.0134379
BMI_F	9.0954e-05	2.18267	-0.00953698	0.000156012	2.22216	-0.00940141
BMI_M	0.00251516	2.1808	-0.050513	0.000279466	2.22002	-0.0487971
BMI_C	0.00171078	2.17903	-0.0413616	0.000674154	2.22159	-0.0412129
Num_Sexual_partners_F	0.000100151	2.18064	0.0100076	0.000671544	2.22159	0.00987437
Num_Sexual_partners_M	0.00287646	2.17892	0.0536327	0.000631401	2.22163	0.0526584
Num_Sexual_partners_C	0.0011268	2.1822	0.0335679	0.000284534	2.22002	0.0334578
Age_at_fist_sex_F	0.000470151	2.18363	0.021683	0.00135206	2.22083	0.0212518
Age_at_fist_sex_M	0.00126158	2.18348	0.0355188	-7.92643e-05	2.22234	0.0356354
Age_at_fist_sex_C	0.00170993	2.18178	0.0413513	0.000210532	2.21999	0.0403388
IQ_F	1.63716e-07	2.1844	0.000127951	-0.000968618	2.22244	0.000125625
IQ_M	0.000110504	2.18318	0.0105121	-0.000615819	2.22302	0.0104495
IQ_C	0.00143846	2.18243	0.037927	-0.000278879	2.22265	0.036949
Cognitive_skills_F	6.08866e-05	2.18402	0.00775156	-0.000310284	2.22268	0.00757614
Cognitive_skills_M	7.38664e-05	2.1822	-0.00859456	-0.000114661	2.22246	-0.00852306
Cognitive_skills_C	0.000728687	2.18234	-0.0269942	-0.000167075	2.22232	-0.0266479
Noncognitive_skills_F	0.00174726	2.18092	-0.0418003	-0.000192065	2.22255	-0.0408228
Noncognitive_skills_M	0.00219985	2.18057	0.0469025	-0.0021408	2.22471	-0.0451839
Noncognitive_skills_C	0.000324126	2.18374	0.0180035	-0.00124856	2.22372	0.0175412
Depression_F	0.00130671	2.18437	0.0321041	-0.00149829	2.224	0.031586
Depression_M	0.00134481	2.18214	0.0366717	0.00110209	2.22111	0.0359186
Depression_C	0.0026171	2.17985	0.0511576	0.00122778	2.22097	0.0509326
Bipolar_F	0.00171174	2.1836	-0.0130834	0.00034773	2.22195	-0.0133737
Bipolar_M	0.00163463	2.18147	-0.0127853	0.000906974	2.22133	-0.0127735
Bipolar_C	0.000481994	2.18253	-0.0202039	-0.00014659	2.22235	-0.020339
ADHD_F	0.000668471	2.18246	-0.00817601	-0.000465488	2.22182	-0.00833261
ADHD_M	6.23012e-05	2.18457	0.00249602	-0.00032659	2.2227	0.00248129
ADHD_C	5.55805e-05	2.185	-0.00235755	6.50386e-05	2.22233	-0.00230907
Cross_Psych_disorders_F	0.000510029	2.18129	0.0225838	-0.00115172	2.22362	0.0220857
Cross_Psych_disorders_M	3.15147e-05	2.18293	0.00056138	-9.58464e-05	2.22244	0.000546052
Cross_Psych_disorders_C	8.96209e-05	2.18259	0.0283013	-0.000171615	2.22253	0.0272344
Neuroticism_F	0.000684571	2.17893	0.0261643	0.000826428	2.22142	0.0256126
Neuroticism_M	0.00144231	2.18385	0.0120096	0.000310192	2.22199	0.0115291
Neuroticism_C	0.00069476	2.18088	0.0263583	0.00186143	2.22207	0.0265735
Cigarettes_week_F	0.00138923	2.1847	0.0117866	9.51048e-05	2.22223	0.0115597
Cigarettes_week_M	0.00121391	2.18022	0.0348412	0.00160545	2.22055	0.0345972
Cigarettes_week_C	0.00160224	2.18312	0.012658	0.000358988	2.22194	0.0123225
Loneliness_F	0.00113759	2.1809	0.0337282	0.00143031	2.22075	0.0340637
Loneliness_M	0.00326135	2.18153	0.0180592	0.00103496	2.22119	0.0176646
Loneliness_C	0.00227918	2.18158	0.0477408	0.00420323	2.21766	0.0469307
Wellbeing_F	0.00240691	2.17834	-0.0490602	0.00311135	2.21888	-0.0493536
Wellbeing_M	0.00262737	2.18139	-0.0512579	0.00256948	2.21948	-0.0484792
Wellbeing_C	0.00458983	2.17923	-0.0677472	0.00427253	2.21367	-0.0653878
Educational_attainment_FM	0.00010915	2.17977	0.0104475	4.89139e-05	2.22233	0.0103809
BMI_FM	0.00075854	2.18054	-0.00870942	-0.000809891	2.22243	-0.00873473
Num_Sexual_partners_FM	0.000157748	2.17908	0.00397176	-0.00250152	2.22261	0.00397278
Age_at_fist_sex_FM	5.76639e-05	2.1826	-0.000759368	-0.00155795	2.22251	-0.000776667
IQ_FM	5.10225e-05	2.17774	0.00225882	-0.000718657	2.22242	0.0022786
Cognitive_skills_FM	7.9713e-05	2.1818	-0.00892821	-0.000174018	2.22253	-0.00886587
Noncognitive_skills_FM	3.71019e-05	2.18332	0.00691194	-0.000510378	2.2229	0.00599522
Depression_FM	7.72352e-08	2.18281	-0.000878835	-0.00103919	2.22245	-8.55233e-05
Bipolar_FM	0.000118622	2.18231	-0.0108914	-0.000186201	2.22213	0.0110071
ADHD_FM	5.80134e-05	2.18107	-0.0024086	-0.00132713	2.22248	-0.00248586
Cross_Psych_disorders_FM	5.04247e-05	2.18332	0.00224554	-0.000222407	2.22258	0.0021507
Neuroticism_FM	0.000254462	2.18064	0.0159518	-0.000791645	2.22322	0.0145289
Cigarettes_week_FM	0.000112608	2.18276	0.0106117	-0.000300352	2.22267	0.0103536
Loneliness_FM	4.5259e-05	2.18131	0.00672748	-0.000434652	2.22282	0.00689433
Wellbeing_FM	0.000458131	2.18279	0.021404	-0.00127384	2.22375	0.0212222

## Sheet: results_SMFQ_14years
PGS	Rsquared_train....c.3.2540494e.05..3.05570969e.05..0.0001349788446..	RMSE_train....c.5.136144..5.137123..5.135267..5.135678..5.133804..	stdCoeff_train....c..0.0018038984..0.0055278474...0.0116180396..	Rsquared_test....c.4.02182665e.06..0.00014106682137..0.00099810004393..	RMSE_test....c.5.04144..5.041095..5.038934..5.041439..5.039892..	stdCoeff_test
Educational_attainment_F	3.25405e-05	5.13614	-0.0018039	4.02183e-06	5.04144	0.00200545
Educational_attainment_M	3.05571e-05	5.13712	0.00552785	0.000141067	5.0411	-0.0118772
Educational_attainment_C	0.000134979	5.13527	-0.011618	0.0009981	5.03893	-0.0315927
BMI_F	0.000576691	5.13568	-0.0240144	4.59754e-05	5.04144	-0.0214419
BMI_M	0.00114939	5.1338	-0.0339026	0.000618033	5.03989	-0.0248603
BMI_C	0.00329999	5.12805	-0.0574456	0.00236409	5.03549	-0.0486219
Num_Sexual_partners_F	0.00257167	5.13686	0.0160364	0.00309366	5.03365	0.0556207
Num_Sexual_partners_M	0.00452679	5.1247	0.0672814	0.000527727	5.04012	0.0229723
Num_Sexual_partners_C	0.00518012	5.12352	0.071973	0.00325123	5.03325	0.0570196
Age_at_fist_sex_F	0.000135379	5.13604	0.0116351	0.00131294	5.03814	0.0362345
Age_at_fist_sex_M	0.00344013	5.12774	0.0586526	0.000471666	5.04032	0.0211463
Age_at_fist_sex_C	0.0032063	5.12938	0.0566242	0.0038146	5.03183	0.0617624
IQ_F	0.00055953	5.13475	-0.0236544	1.7594e-05	5.04145	-0.000419451
IQ_M	0.000444493	5.13655	-0.021083	5.02309e-05	5.04132	0.00708738
IQ_C	0.00098378	5.13448	-0.0313653	0.000743623	5.03958	0.0272695
Cognitive_skills_F	0.00056773	5.1363	0.0238271	0.000169882	5.04141	0.00412167
Cognitive_skills_M	0.000525079	5.13568	0.0229146	6.20757e-05	5.04129	-0.00787881
Cognitive_skills_C	0.00128797	5.13467	0.0358883	0.000309293	5.04067	-0.0175867
Noncognitive_skills_F	0.000541877	5.13517	-0.0232783	2.03338e-05	5.0414	-0.0045093
Noncognitive_skills_M	3.37035e-06	5.1363	-0.000580547	0.000347842	5.04057	-0.0186409
Noncognitive_skills_C	0.000715364	5.13512	-0.0267463	0.000564228	5.04003	-0.0237535
Depression_F	0.00317357	5.12744	0.0563345	0.000462306	5.04028	0.0215013
Depression_M	0.00292915	5.13018	0.0541216	0.00497425	5.0289	0.0705284
Depression_C	0.00747955	5.11683	0.0864844	0.00664414	5.02467	0.0815116
Bipolar_F	3.44645e-05	5.13792	-0.000587068	0.000305909	5.04137	0.00553091
Bipolar_M	0.000136106	5.13638	0.0116664	0.00174615	5.03705	0.0417869
Bipolar_C	8.45296e-05	5.13691	-0.009194	0.00126979	5.03825	0.0356269
ADHD_F	1.78853e-05	5.13743	-0.00422911	0.000191353	5.0414	0.00437439
ADHD_M	2.62034e-06	5.13595	0.000511893	0.000433604	5.04036	0.0208232
ADHD_C	0.000346786	5.13534	-0.0186222	0.000911639	5.03915	0.0301934
Cross_Psych_disorders_F	6.79288e-06	5.13758	-0.00260631	0.000325001	5.04137	-0.00570089
Cross_Psych_disorders_M	6.10412e-06	5.13723	-0.00247065	0.00230259	5.03564	-0.0479853
Cross_Psych_disorders_C	0.000166436	5.13619	-0.012901	0.00127611	5.03823	-0.0357227
Neuroticism_F	0.00131662	5.13185	0.0362853	0.000626158	5.03987	0.0250213
Neuroticism_M	0.000155319	5.13682	0.0124627	0.00861757	5.01968	0.0928309
Neuroticism_C	0.00325937	5.1278	0.0570909	0.00461741	5.0298	0.0679515
Cigarettes_week_F	0.00172696	5.13302	0.0415567	6.12489e-05	5.0413	0.00782617
Cigarettes_week_M	0.000597324	5.13492	0.0244402	0.000192247	5.04097	0.0138653
Cigarettes_week_C	0.00166963	5.13348	0.040861	2.67148e-06	5.04145	-0.000516864
Loneliness_F	0.00279859	5.13097	0.0529017	0.00211074	5.03613	-0.0459428
Loneliness_M	0.00194247	5.13162	0.0440734	0.00716615	5.02335	0.0846531
Loneliness_C	0.0069071	5.11952	0.0831089	0.00980018	5.01669	0.0989959
Wellbeing_F	0.00349645	5.12803	-0.0591308	0.00203182	5.03633	-0.0450758
Wellbeing_M	0.00250816	5.12892	-0.0500815	0.00514754	5.02846	-0.0717463
Wellbeing_C	0.0111977	5.10814	-0.105819	0.0042408	5.0262	-0.0657256
Educational_attainment_FM	0.000566009	5.13538	-0.0237909	0.000311663	5.04066	-0.017654
BMI_FM	1.90669e-05	5.13633	-0.00436657	0.00015707	5.04141	0.0039632
Num_Sexual_partners_FM	0.00043859	5.13685	0.00662261	0.000551864	5.04006	0.0234918
Age_at_fist_sex_FM	0.000621728	5.13455	-0.0249345	0.00212255	5.04092	0.014569
IQ_FM	5.27702e-05	5.1379	0.00726431	0.000413921	5.04041	0.0203451
Cognitive_skills_FM	8.00205e-05	5.13675	0.00894542	0.000843059	5.03932	0.0290355
Noncognitive_skills_FM	0.000265161	5.13738	-0.00514938	0.000290566	5.04072	0.017046
Depression_FM	9.24404e-05	5.13638	-0.00961459	5.94801e-05	5.0413	-0.00712336
Bipolar_FM	3.47939e-05	5.13687	0.00186531	0.00019054	5.04097	-0.0138036
ADHD_FM	3.3482e-05	5.13608	0.00578637	0.000234483	5.04139	0.00484188
Cross_Psych_disorders_FM	2.14392e-05	5.13697	0.00463025	0.000273581	5.04076	-0.0165403
Neuroticism_FM	0.000249576	5.13664	0.015798	0.000241639	5.04144	0.00155448
Cigarettes_week_FM	0.000146701	5.13638	0.012112	4.03679e-07	5.04145	0.000209918
Loneliness_FM	0.000158064	5.13702	-0.0125723	0.000442235	5.04033	0.0210768
Wellbeing_FM	3.92555e-05	5.13682	-0.00626542	0.00129069	5.0382	0.0359261

## Sheet: results_SCARED_8years
PGS	Rsquared_train....c.0.000101218957395..0.000310403138201..0.00037915799725..	RMSE_train....c.1.124913..1.125435..1.125856..1.125444..1.125646..	stdCoeff_train....c.0.0106076326..0.0176182615...0.00615758067..	Rsquared_test....c.6.599017673e.05..0.0030300803403..0.00022166799125..	RMSE_test....c.1.125757..1.124086..1.125782..1.12488..1.125583..	stdCoeff_test
Educational_attainment_F	0.000101219	1.12491	0.0106076	6.59902e-05	1.12576	0.00812343
Educational_attainment_M	0.000310403	1.12543	0.0176183	0.00303008	1.12409	0.0550728
Educational_attainment_C	0.000379158	1.12586	-0.00615758	0.000221668	1.12578	-0.00465489
BMI_F	0.000203219	1.12544	0.0142555	0.00162314	1.12488	0.0402883
BMI_M	4.64065e-06	1.12565	-0.00215422	0.000375409	1.12558	0.0193755
BMI_C	0.00452164	1.1237	0.0212642	0.00253029	1.12437	0.0503019
Num_Sexual_partners_F	0.000213157	1.12434	0.0145999	0.000279163	1.12564	-0.0167082
Num_Sexual_partners_M	1.10062e-05	1.12525	0.00104911	0.000368593	1.1256	-0.0183537
Num_Sexual_partners_C	7.3225e-05	1.12548	-0.00855716	0.00141474	1.125	-0.037613
Age_at_fist_sex_F	0.000217359	1.12522	-0.00466217	0.000238436	1.12578	-0.00488299
Age_at_fist_sex_M	2.25671e-05	1.1251	-0.00150224	0.00206116	1.12463	-0.0453999
Age_at_fist_sex_C	0.00092902	1.12548	-0.00963857	0.00150405	1.12495	-0.038782
IQ_F	0.000213598	1.12549	0.00462167	2.18651e-05	1.12579	-0.00147868
IQ_M	0.000132689	1.12445	-0.0115191	0.00322755	1.12398	-0.0568116
IQ_C	0.000199933	1.1256	-0.00141398	2.39849e-05	1.12579	-0.00154871
Cognitive_skills_F	6.00288e-05	1.12512	-0.00774783	7.67427e-05	1.12575	0.00876029
Cognitive_skills_M	2.2734e-05	1.12516	-0.00157781	0.00411147	1.12348	0.0641208
Cognitive_skills_C	0.000279484	1.12581	-0.00528663	0.00112494	1.12573	0.0106063
Noncognitive_skills_F	7.33942e-05	1.12552	0.008567	0.000110075	1.12573	-0.0104916
Noncognitive_skills_M	0.00059926	1.12501	0.0244798	8.77506e-05	1.12574	0.00936753
Noncognitive_skills_C	0.000153906	1.12581	-0.00392308	0.000211714	1.12567	-0.0145504
Depression_F	5.34043e-08	1.12578	-7.30783e-05	0.00013978	1.12572	0.0118229
Depression_M	0.000749515	1.12526	0.0273773	0.000892309	1.12529	0.0298715
Depression_C	0.00025566	1.12526	0.0159894	0.000817351	1.12533	0.0285894
Bipolar_F	0.000962132	1.12474	-0.0310182	0.000747938	1.12575	-0.00864834
Bipolar_M	0.000357233	1.12513	-0.0189006	0.000910445	1.12528	-0.0301736
Bipolar_C	0.000692766	1.12527	-0.0263205	0.00114802	1.12515	-0.0338825
ADHD_F	0.000226925	1.12552	-0.015064	0.000213935	1.12578	-0.00462531
ADHD_M	0.000259813	1.12468	-0.0161187	0.000348371	1.12577	-0.00590229
ADHD_C	0.000142686	1.12515	-0.0119451	0.0002108	1.12568	-0.014519
Cross_Psych_disorders_F	1.59375e-05	1.12536	-0.00126244	0.000292843	1.12563	0.0171127
Cross_Psych_disorders_M	0.000138551	1.12603	-0.00372225	0.000151741	1.12571	-0.0123183
Cross_Psych_disorders_C	0.000125591	1.12478	-0.0123515	0.000384684	1.12558	-0.0196134
Neuroticism_F	0.00035637	1.12567	0.0191147	0.000116798	1.12579	-0.00341757
Neuroticism_M	0.000814867	1.12439	0.0285459	4.16999e-05	1.12579	-0.00204205
Neuroticism_C	0.00183009	1.12462	0.0427796	0.00148988	1.12495	0.038599
Cigarettes_week_F	5.91546e-05	1.12499	0.00769121	0.000189653	1.12569	-0.0137714
Cigarettes_week_M	0.000964671	1.12438	0.0310592	0.00125372	1.12509	0.0354079
Cigarettes_week_C	1.70759e-05	1.12519	0.00130675	0.000449481	1.12577	0.00703425
Loneliness_F	7.31055e-05	1.12503	0.026517	4.65108e-05	1.12577	-0.00681989
Loneliness_M	0.00114779	1.12468	0.033879	0.000175417	1.1257	-0.0132445
Loneliness_C	0.000841713	1.12459	0.0290123	0.000105571	1.12573	0.0102748
Wellbeing_F	0.00118541	1.12481	-0.0344298	0.000873503	1.1253	-0.0295551
Wellbeing_M	0.0020866	1.1243	-0.0456794	0.000315349	1.12578	0.0056156
Wellbeing_C	0.00389717	1.12329	-0.0624273	0.0012624	1.12508	-0.0355303
Educational_attainment_FM	1.33508e-05	1.12598	-0.00115546	0.00111587	1.12517	0.0334046
BMI_FM	0.00014621	1.12513	-0.0120917	0.00057705	1.12576	0.00796338
Num_Sexual_partners_FM	0.000270202	1.12561	0.00519809	0.000684289	1.12541	0.0261589
Age_at_fist_sex_FM	0.00139586	1.12457	0.0373612	0.000208229	1.12578	-0.00456321
IQ_FM	2.36798e-05	1.12593	0.00486619	6.70687e-07	1.12579	-0.000258976
Cognitive_skills_FM	0.000101282	1.12555	0.0100639	8.96188e-05	1.12574	0.00946672
Noncognitive_skills_FM	0.000298616	1.12571	0.00546457	0.000155526	1.12571	-0.012471
Depression_FM	0.000155697	1.12536	-0.00394585	4.00761e-05	1.12579	-0.0020019
Bipolar_FM	3.2321e-05	1.12562	0.000568251	0.00138221	1.12502	0.0371781
ADHD_FM	0.000306458	1.12598	-0.00535853	0.00269177	1.12428	0.0518823
Cross_Psych_disorders_FM	0.00214497	1.12544	-0.0146457	7.47524e-06	1.12579	-0.000864594
Neuroticism_FM	0.000317393	1.12529	0.00633761	0.0027065	1.12564	0.0164514
Cigarettes_week_FM	6.50738e-05	1.12474	-0.00255024	0.00014751	1.12571	0.0121454
Loneliness_FM	0.000257565	1.1258	0.00575089	0.00184623	1.12569	0.0135876
Wellbeing_FM	0.000429869	1.12537	0.00655644	0.00024033	1.12566	0.0155026

## Sheet: results_SCARED_14years
PGS	Rsquared_train....c.3.254e.06..3.056e.05..0.000135..0.0005767..	RMSE_train....c.5.137..5.136..5.136..5.135..5.135..5.134..5.128..	stdCoeff_train....c..0.001804..0.005528...0.01162...0.02401..	Rsquared_test....c.4.022e.06..0.0001411..0.0009981..4.598e.05..	RMSE_test....c.5.041..5.041..5.039..5.041..5.04..5.035..5.034..	stdCoeff_test
Educational_attainment_F	3.254e-06	5.137	-0.001804	4.022e-06	5.041	0.002005
Educational_attainment_M	3.056e-05	5.136	0.005528	0.0001411	5.041	-0.01188
Educational_attainment_C	0.000135	5.136	-0.01162	0.0009981	5.039	-0.03159
BMI_F	0.0005767	5.135	-0.02401	4.598e-05	5.041	-0.002144
BMI_M	0.001149	5.135	-0.0339	0.000618	5.04	-0.02486
BMI_C	0.0033	5.134	-0.05745	0.002364	5.035	-0.04862
Num_Sexual_partners_F	0.0002572	5.128	0.01604	0.003094	5.034	0.05562
Num_Sexual_partners_M	0.004527	5.135	0.06728	0.0005277	5.04	0.02297
Num_Sexual_partners_C	0.00518	5.126	0.07197	0.003251	5.033	0.05702
Age_at_fist_sex_F	0.0001354	5.124	0.01164	0.001313	5.038	0.03623
Age_at_fist_sex_M	0.00344	5.137	0.05865	0.0004472	5.04	0.02115
Age_at_fist_sex_C	0.003206	5.128	0.05662	0.003815	5.032	0.06176
IQ_F	0.0005595	5.129	-0.02365	1.759e-07	5.041	-0.0004195
IQ_M	0.0004445	5.136	-0.02108	5.023e-05	5.041	0.007087
IQ_C	0.0009838	5.135	-0.03137	0.0007436	5.04	0.02727
Cognitive_skills_F	0.0005677	5.138	0.02383	0.0001699	5.041	0.004122
Cognitive_skills_M	0.0005251	5.133	0.02291	0.0006208	5.041	-0.007879
Cognitive_skills_C	0.001288	5.135	0.03589	0.0003093	5.041	-0.01759
Noncognitive_skills_F	0.0005419	5.135	-0.02328	0.0002033	5.041	-0.004509
Noncognitive_skills_M	3.37e-06	5.135	-0.0005805	0.0003475	5.041	-0.01864
Noncognitive_skills_C	0.0007154	5.134	-0.02675	0.0005642	5.041	-0.02375
Depression_F	0.003174	5.136	0.05633	0.0004623	5.041	0.0215
Depression_M	0.002929	5.135	0.05412	0.004974	5.04	0.07053
Depression_C	0.00748	5.129	0.08648	0.006644	5.04	0.08151
Bipolar_F	3.446e-06	5.13	-0.0005871	0.0003059	5.029	0.00553
Bipolar_M	0.0001361	5.117	0.01167	0.001746	5.025	0.04179
Bipolar_C	8.453e-05	5.137	-0.009194	0.001269	5.041	0.03563
ADHD_F	1.789e-05	5.136	-0.004229	0.0001914	5.037	0.004374
ADHD_M	2.62e-06	5.136	0.0005119	0.0004336	5.038	0.02082
ADHD_C	0.0003468	5.138	-0.01862	0.0009116	5.041	0.03019
Cross_Psych_disorders_F	6.793e-05	5.137	-0.002606	3.25e-05	5.04	-0.005701
Cross_Psych_disorders_M	6.104e-05	5.137	-0.002471	0.002303	5.039	-0.04799
Cross_Psych_disorders_C	0.0001664	5.136	-0.0129	0.001276	5.041	-0.03572
Neuroticism_F	0.001317	5.138	0.03629	0.0006262	5.036	0.02502
Neuroticism_M	0.0001553	5.136	0.01246	0.008618	5.038	0.09283
Neuroticism_C	0.003259	5.136	0.05709	0.004617	5.04	0.06795
Cigarettes_week_F	0.001727	5.136	0.04156	0.0006125	5.02	0.007826
Cigarettes_week_M	0.0005973	5.136	0.02444	0.0001922	5.03	0.01387
Cigarettes_week_C	0.00167	5.134	0.04086	2.671e-06	5.041	-0.0005169
Loneliness_F	0.002799	5.137	0.0529	0.002111	5.041	0.04594
Loneliness_M	0.001942	5.13	0.04407	0.007166	5.036	0.08465
Loneliness_C	0.006907	5.131	0.08311	0.0098	5.023	0.099
Wellbeing_F	0.003496	5.136	-0.05913	0.002032	5.017	-0.04508
Wellbeing_M	0.002508	5.132	-0.05008	0.005148	5.036	-0.07175
Wellbeing_C	0.0112	5.132	-0.1058	0.004241	5.028	-0.06572
Educational_attainment_FM	0.000566	5.118	-0.02379	0.0003117	5.026	-0.01765
BMI_FM	0.0001907	5.127	-0.004367	0.0001571	5.041	0.003963
Num_Sexual_partners_FM	0.0004386	5.131	0.006623	0.0005519	5.041	0.02349
Age_at_fist_sex_FM	0.0006217	5.108	-0.02493	0.0002123	5.04	0.01457
IQ_FM	5.277e-05	5.136	0.007264	0.0004139	5.041	0.02035
Cognitive_skills_FM	8.002e-05	5.136	0.008945	0.0008431	5.041	0.02904
Noncognitive_skills_FM	2.652e-05	5.136	-0.005149	0.0002906	5.04	0.01705
Depression_FM	9.244e-05	5.136	-0.009615	5.948e-05	5.039	-0.007712
Bipolar_FM	3.479e-05	5.137	0.001865	0.0001905	5.041	-0.0138
ADHD_FM	3.348e-05	5.137	0.005786	0.0002344	5.041	0.004842
Cross_Psych_disorders_FM	2.144e-05	5.137	0.00463	0.0002736	5.041	-0.01654
Neuroticism_FM	2.496e-05	5.137	0.0158	2.416e-05	5.041	0.001554
Cigarettes_week_FM	1.467e-05	5.137	0.01211	4.037e-07	5.038	0.0002009
Loneliness_FM	1.581e-05	5.135	-0.01257	4.42e-05	5.025	0.02108
Wellbeing_FM	3.926e-05	5.137	-0.006265	0.001291	5.032	0.03593
